# Supplementary material for: Summary of 2021 Clinical Guidelines for the Diagnosis and Treatment of HIV/AIDS in HIV-infected Koreans
Source: PubMed Central journal article supplement — Infect Chemother. 2021 Aug 5;53(3):592–616. doi: 10.3947/ic.2021.0305 (PMC8511382; doi:10.3947/ic.2021.0305), 2021-08-05
Supplement: ic-53-592-s001.pdf [file ic-53-592-s001.pdf]

## Special Article

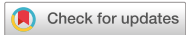

# 국내 사람면역결핍바이러스 감염의 진단과 치료에 관한 임상진료지침 권고안: 2021년 개정판

## OPEN ACCESS

Received: Jul 12, 2021

### Corresponding Author:

**The Committee for Clinical Guidelines for the Diagnosis and Treatment of HIV/AIDS of the Korean Society for AIDS**

The Korean Society for AIDS, 806, SeochoTown Trapalace, 23 Seocho-daero 74-gil, Seocho-gu, Seoul 06621, Korea.

Tel: +82-2-3487-1755

Fax: +82-2-585-8384

E-mail: kosa@kosaid.or.kr

Copyright © 2021 by The Korean Society of Infectious Diseases, Korean Society for Antimicrobial Therapy, and The Korean Society for AIDS

This is an Open Access article distributed under the terms of the Creative Commons Attribution Non-Commercial License (<https://creativecommons.org/licenses/by-nc/4.0/>) which permits unrestricted non-commercial use, distribution, and reproduction in any medium, provided the original work is properly cited.

\*대한에이즈학회 사람면역결핍바이러스 감염 진단과 치료 임상진료지침 제정위원회

### 위원장

최준용(연세대학교 세브란스병원 감염내과)

### 위원

위성현(가톨릭대학교 성빈센트병원 감염내과)

김남중(서울대학교 서울대학교병원 감염내과)

방지환(서울대학교 서울시립보라매병원 감염내과)

## 대한에이즈학회

## ABSTRACT

Since the establishment of the Committee for Clinical Guidelines for the Diagnosis and Treatment of human immunodeficiency virus/acquired immune deficiency syndrome (HIV/AIDS) by the Korean Society for AIDS in 2010, clinical guidelines have been prepared in 2011, 2013, 2015, and 2018. As new research findings on the epidemiology, diagnosis, and treatment of AIDS have been published in and outside of Korea along with the development and introduction of new antiretroviral medications, a need has arisen to revise the clinical guidelines by analyzing such new data. The clinical guidelines address the initial evaluation of patients diagnosed with HIV/AIDS, follow-up tests, appropriate timing of medication, appropriate antiretroviral medications, treatment strategies for patients who have concurrent infections with hepatitis B or C virus, recommendations for resistance testing, treatment for patient with HIV and tuberculosis coinfections and treatment in pregnant women. Through these clinical guidelines, the Korean Society for AIDS and the Committee for Clinical Guidelines for the Diagnosis and Treatment of HIV/AIDS would like to contribute to overcoming AIDS by delivering the latest data and treatment strategies to healthcare professionals who treat AIDS in the clinic.

**Keywords:** HIV/AIDS; Diagnosis; Antiretroviral treatment; Guidelines

## 1. 목적

본 지침의 목적은 2018년 대한에이즈학회에서 발표한 국내 사람면역결핍바이러스 (human immunodeficiency virus, HIV) 감염인의 진단과 치료에 관한 임상진료지침 권고안을 최근 실정에 맞추어 개정하는 것이다[1]. 국내에 여러 항레트로바이러스 약제들이 새로 도입되었고 사람면역결핍바이러스 영역에서 새로운 연구 결과들이 많이 발표되면서 권고안의 개정이 필요하게 되었다.

송준영(고려대학교 구로병원 감염내과)  
최재필 (서울의료원 감염내과)  
진범식 (국립중앙의료원 감염내과)  
신소연(가톨릭관동대학교 국제성모병원  
감염내과)

\*본 권고안은 2021년 6월 까지의 국내  
실정에 적합한 사람면역결핍바이러스  
감염인의 사람면역결핍바이러스 감염  
진단 및 치료에 대한 기본적인 원칙을  
제시하는 것으로서, 모든 환자에 대해서  
본 진료지침을 일률적으로 적용하는  
것보다는 각 환자의 여러 임상 상황들을  
고려한 의사의 최종적인 판단에 의한  
진료가 중요하다.

\*본 권고안은 개인적인 진료 및 교육  
목적으로 활용될 수 있지만 보험심사의  
적정성이나 약제의 상업적 홍보의 근거가  
될 수 없으며, 어떠한 형태로든 다른  
목적으로 사용하고자 하는 경우에는  
제정위원회에 서면 요구서를 제출하여  
서면 동의를 얻어야 한다.

#### Conflict of Interest

No conflicts of interest.

## 2. 범위

본 진료지침에서는 2021년 6월까지 국내 실정을 고려하여 사람면역결핍바이러스 감염인의  
진단과 치료에 필요한 초기 평가와 추적검사 항목과 주기, 항레트로바이러스 치료 시작 대  
상, 초기치료와 치료 경험자의 항레트로바이러스제 선택, 사람면역결핍바이러스와 B형/C형  
간염바이러스 동시 감염 환자 치료, 결핵 동시감염자의 항레트로바이러스 치료, 내성검사의  
시행 및 활용, 임신부의 항레트로바이러스 치료에 대한 권고안을 제시 한다.

## 3. 임상진료지침 위원회 구성

2020년 6월 대한에이즈학회에서 국내 사람면역결핍바이러스 감염인의 진단과 치료에 대한  
임상진료지침 권고안을 개정하기 위한 임상진료지침 위원회를 구성하였다.

## 4. 핵심질문(KEY QUESTION) 설정 및 합의 도출 과정

국내에서 사람면역결핍바이러스 감염의 진단과 치료에 대한 임상진료지침을 마련하기 위  
하여 초기 평가와 추적 검사, 고강도 항레트로바이러스요법(highly active antiretroviral thera-  
py, HAART) 시작 대상, 치료경험이 없는 환자에서의 고강도 항레트로바이러스요법, 치료경  
험이 있는 환자에서 고강도 항레트로바이러스요법, human immunodeficiency virus/hepatitis  
B virus (HIV/HBV) 와 human immunodeficiency virus/hepatitis C virus (HIV/HCV) 동시 감염자  
의 항레트로바이러스 치료, 결핵/HIV 동시감염자의 항레트로바이러스 치료, 내성검사의 시  
행과 활용, 임신부의 고강도 항레트로바이러스요법으로 분야를 나누었다. 핵심 질문은 관련  
문헌, 국외 진료지침, 현재 국내에서 이용 가능한 검사와 항레트로바이러스 치료 약제 등을  
검토한 후에 실제 임상 진료에서 만날 수 있는 다양한 상황들을 고려하여 선정하였다. 또한  
임상진료지침 위원회에서 여러 차례의 회의를 시행하여 각 분야별 임상진료지침의 핵심 질  
문을 최종적으로 선정하였다.

## 5. 권고의 강도와 근거 수준

본 권고안에서 사용된 권장 강도와 근거 수준은 미국 Department of Health and Human Ser-  
vices의 최근 지침에서 사용하는 방법을 받아들여 표 1과 같이 권장 강도는 A, B, C3가지로 분  
류하였고, 근거 등급은 I, II, III로 표시하였다(Table 1).

**Table 1.** Strength of recommendation and quality of evidence for recommendation

| Strength of Recommendation                   | Quality of Evidence for Recommendation                                                                               |
|----------------------------------------------|----------------------------------------------------------------------------------------------------------------------|
| A: Strong recommendation for the statement   | I: One or more randomized trials with clinical outcomes and/or validated laboratory endpoints                        |
| B: Moderate recommendation for the statement | II: One or more well-designed, nonrandomized trials or observational cohort studies with long-term clinical outcomes |
| C: Optional recommendation for the statement | III: Expert opinion                                                                                                  |

## 1) 권고의 강도

- (1) A ~ 강한 수준의 권고
- (2) B ~ 중간 수준의 권고
- (3) C ~ 선택적 권고

## 2) 근거 수준

- (1) I ~ 하나 이상의, 타당한 임상적 혹은 실험실적 종말점을 사용한 무작위 임상시험의 근거가 있음.
- (2) II ~ 잘 설계된 비무작위 임상시험의 근거가 있거나, 장기간의 임상적 결과에 대해 분석한 관찰 코호트 연구의 근거가 있음
- (3) III ~ 권위자들의 견해

HAART를 시행한 적이 없는 환자들을 치료 경험이 없는 환자(treatment-naive patient)로 표기하고, 과거에 HAART를 시행한 적이 있는 환자들을 치료 경험이 있는 환자(treatment-experienced patient)로 표기하였다.

본 임상진료지침 권고안에서 사용된 약어들은 다음과 같다.

ABC, abacavir; ATV, atazanavir; ATV/c, atazanavir/cobicistat; ATV/r, ritonavir-boosted atazanavir; atazanavir/ritonavir; BIC, bictegravir; DRV, darunavir; DRV/c, darunavir/cobicistat; DRV/r, ritonavir-boosted darunavir; darunavir/ritonavir; DTG, dolutegravir; EFV, efavirenz; EVG, elvitegravir; EVG/c, elvitegravir/cobicistat; FTC, emtricitabine; HAART, highly active antiretroviral therapy; HBV, hepatitis B virus; HCV, hepatitis C virus; HIV, human immunodeficiency virus; INSTI, integrase strand transfer inhibitor; LPV, lopinavir; LPV/r, ritonavir-boosted lopinavir; lopinavir/ritonavir; NNRTI, non-nucleoside reverse transcriptase inhibitor; NRTI, nucleoside reverse transcriptase inhibitor; PI, protease inhibitor; RAL, raltegravir; RPV, rilpivirine; TDF, tenofovir disoproxil fumarate; TAF, tenofovir alafenamide; ZDV, zidovudine; 3TC, lamivudine.

## 6. 권고문

### 1) 초기평가 및 추적검사

#### (1) HIV 감염인이 초기 방문하였을 때 시행해야 할 검사는? (Table 2)

**Table 2.** Initial assessment in HIV-infected persons

|                                                         |
|---------------------------------------------------------|
| HIV antibody test                                       |
| CD4+ T cell count and percent                           |
| Complete blood count and differentials                  |
| Basic chemistry, liver and renal function tests         |
| Fasting glucose, lipid profile                          |
| Serologic tests for hepatitis A, B and C viruses        |
| Syphilis serology                                       |
| Screening tests for other sexually transmitted diseases |
| Chest X-ray                                             |
| Tuberculin skin test or IFN- $\gamma$ release assay     |
| Toxoplasmosis serology                                  |
| Bone densitometry                                       |
| HIV, human immunodeficiency virus; IFN, interferon.     |

1. CD4+ T 세포수와 백분율, 혈장 HIV RNA 정량검사를 시행한다(A-I). 치료를 요하는 기회 감염에 감염된 HIV 감염인은 급성기 치료 후 안정화되면 CD4+ T 세포수, 혈장 HIV RNA 정량검사를 반복한다 (A-II) [2-4].
2. 백혈구 백분율(differential count)을 포함한 일반혈액검사(complete blood count, CBC)와 일반화학검사를 시행한다 (A-III) [2, 4, 5].
3. B형 간염(A-III), C형 간염(A-III), A형 간염(B-III)에 대한 혈청학적 선별검사를 실시한다 [2, 4].
4. 독소포자충(B-III)과 같은 기회감염에 대한 선별검사를 한다 [6].
5. 결핵을 선별하기 위해 결핵피부반응검사(tuberculin skin test, TST) 또는 Interferon (IFN)- $\gamma$  release assay를 시행한다 (A-II), 진행된 HIV 감염인에서는 TST가 음성이라도 CD4+ T 세포수가 200개/mm<sup>3</sup> 이상으로 회복된 후 재검을 권장한다 (A-III) [6].
6. 여성에서는 자궁경부세포도말검사(Pap test)를 시행하여 자궁 경부암에 대한 선별검사를 시행한다 [7].
7. 매독(A-II), 임질, 클라미디아 등 기타 성매개 질환에 대한 선별검사를 한다 (B-II) [4, 6, 8].
8. 초기 내원 시 HIV 유전형 약제내성검사(genotypic test)를 시행해 전파내성을 평가해야 한다 (A-II) [2, 4].

## (2) HIV 감염인이 초기 방문하였을 때 시행해야 할 영상학적 검사는?

1. 결핵을 선별하기 위해 흉부방사선 검사를 실시한다 (A-III) [4, 6].
2. 50세 이상의 남성, 폐경기 여성, 골절 병력, 스테로이드 사용 기왕력, 또는 성선기능저하자에서는 골밀도 검사 시행을 고려한다 (B-III) [2, 4].

## (3) HAART를 시작하기 전에 확인해야 하는 검사는?

1. HAART를 시행하기 전에 CD4+ T 세포수의 측정이 필요하며(A-II), 항레트로바이러스 요법을 시작하기 전 4주 이내 HIV RNA 수치를 측정해야 한다 (A-III) [2, 4].
2. 여성에서 HAART를 시행하기 전 임신 가능성이 있는 경우에는 임신 반응 검사를 실시한다 (A-III) [2].
3. Abacavir 투여 전에는 HLA-B\*5701 검사의 시행을 고려하며 (A-I), 검사가 불가능한 경우는 환자에게 과민반응 가능성과 주의사항을 충분히 설명한 후에 처방한다 (C-III) [2, 4].
4. HAART를 처음 시작하는 에이즈 환자나 바이러스적 치료실패로 치료 약제의 변경을 고려하는 환자에서는 유전형 내성검사가 권장된다 (A-II) [2, 4].

**(4) 항레트로바이러스 약제를 복용하고 있는 HIV 감염인에서 질병 진행 상태 및 약제 독성 등을 확인하기 위해 시행하는 실험실 검사의 시행 주기는?**

1. HAART를 시행 받고 있는 환자에서 CD4+ T 세포수는 12 - 24주 간격으로 반복하는 것이 원칙이나 (B-II) 치료 약제 투여로 면역기능 회복이 이루어진 후에는 환자 상태에 변화가 없을 시 48주 간격으로 시행할 수 있다 (B-II) [2, 9].
2. HAART를 시행 받고 있는 환자에서 혈장 HIV RNA 정량검사는 12 - 16주 간격으로 반복해야 한다 (A-III). 2년 이상 지속적인 바이러스 억제력을 보이고 임상적으로 안정적이라면 24주 간격으로 추적조사 간격을 늘릴 수 있다 (A-III) [2, 10].
3. HAART를 시행 받고 있는 환자에서 일반혈액검사와 일반화학검사를 12 - 16주 간격으로 반복하며, 2년 이상 지속적인 바이러스 억제력을 보이고 임상적으로 안정적이라면 24주 간격으로 시행할 수 있다 (A-III) [11].
4. Zidovudine이 포함된 약제를 투여하는 경우는 치료 시작 2 - 8주 후에 일반혈액 검사 및 백혈구 백분율 추적검사를 시행한다.
5. 일반화학검사 및 간기능 검사는 치료 시작 2 - 8주에 시행하며, 이후 12 - 24주 간격으로 추적검사를 시행한다. 공복지질검사는 비정상이라면 24주 간격, 정상이라면 48주 간격으로 시행하고, 공복혈당 검사는 비정상이라면 12 - 24주 간격, 정상이라면 48주 간격으로 반복한다 [2, 4, 12].
6. 초기 방문 및 HAART 전에는 기회감염에 대한 평가가 필요하다. HAART를 시작하면 기회감염의 위험이 점차 감소하지만 진행된 HIV 감염인의 경우 치료 초기 12개월 동안은 기회감염에 대한 집중적인 추적조사가 필요하다 (B-II) [6, 13].
7. 바이러스성 간염 및 기회감염에 대한 혈청학적 검사는 초기 방문 검사에서 음성이라면 48주 간격으로 추적 조사한다 (A-III) [6, 13].

## 2) HAART 시작 대상

### (1) HAART의 시작 대상과 시작 시기는?

1. CD4+ T 세포수와 무관하게 모든 HIV 감염인에서 사망률과 질병이환율을 낮추기 위해 HAART를 시행할 것을 권고한다 (A-I) [14-18].
2. 모든 HIV 감염인에서 HAART는 HIV 감염인에서 타인으로의 HIV 감염 전파를 예방하기 위해서 권고된다 (A-I) [19].
3. HIV 감염 진단 당일에 혹은 HIV 감염 진단 후 가능한 일찍 HAART를 시작하는 것이 권고된다 (A-II) [20, 21].
4. 결핵성 뇌수막염이나 크립토쿠쿠스 뇌수막염이 있는 HIV 감염인에서 HAART의 시작을 미룰 수 있다 (B-I) [22, 23].

### 3) 치료경험이 없는 환자에서의 항레트로바이러스 치료

#### (1) 초치료 환자에서 우선적으로 추천되는 항레트로바이러스제 조합은? (Table 3)

##### 1. INSTI가 포함된 조합

대부분의 초치료 환자에서 INSTI가 포함된 항레트로바이러스제 조합이 추천되며 구체적으로는 아래와 같다.

##### (1) ABC/3TC/DTG (A-I) [24-26]

ABC는 치명적인 과민반응을 유발할 수 있으며, 이는 HLA-B\*5701과 연관되어 있다.

HBV 동시 감염 환자에게는 ABC/3TC 약제 조합은 적절하지 않다.

ABC는 심혈관 합병증을 유발할 수 있다는 우려가 있다.

DTG는 태아의 신경관 결손 빈도를 높이는 것으로 알려져 있다. 따라서 임신 12주 이내의 임신부에게 DTG가 포함된 약제를 투여할 경우에는 이득과 위험에 대해 환자와 상의한 후 투여 여부를 결정한다.

DTG는 체중 증가를 유발할 수 있다.

**Table 3.** Recommended antiretroviral regimens for naïve HIV-infected patients

| Regimen                                                                                           | Requirements                                                                                 |
|---------------------------------------------------------------------------------------------------|----------------------------------------------------------------------------------------------|
| <b>Recommended regimens</b>                                                                       |                                                                                              |
| ABC <sup>a,b</sup> /3TC/DTG <sup>c,d</sup>                                                        | HLA-B*5701 negative, HBs Ag negative                                                         |
| TAF <sup>d</sup> /FTC/BIC <sup>d</sup>                                                            |                                                                                              |
| TAF <sup>d</sup> (or TDF <sup>e</sup> )/FTC + DTG <sup>c,d</sup>                                  |                                                                                              |
| TAF <sup>d</sup> (or TDF <sup>e</sup> )/FTC + RAL                                                 |                                                                                              |
| 3TC/DTG <sup>c,d</sup>                                                                            | HBs Ag negative,<br>HIV RNA <500,000 copies/mL                                               |
| TAF <sup>d,f</sup> (or TDF <sup>e</sup> )/FTC + DRV/c(or DRV/r <sup>b</sup> )                     | Use if regimens including an INSTI are not appropriate,<br>Should be taken with food         |
| <b>Alternative regimens</b>                                                                       |                                                                                              |
| TAF <sup>d,f</sup> (or TDF <sup>e</sup> )/FTC/EVG/c                                               | Should be taken with food                                                                    |
| ABC <sup>a,b</sup> /3TC + RAL                                                                     | HBs Ag negative                                                                              |
| TAF <sup>d,f</sup> (or TDF <sup>e</sup> )/FTC + ATV/c(or ATV/r)                                   | Should be taken with food                                                                    |
| ABC <sup>a,b</sup> /3TC + DRV/c(or DRV/r <sup>b</sup> )                                           | HBs Ag negative,<br>Should be taken with food                                                |
| ABC <sup>a,b</sup> /3TC + ATV/c(or ATV/r)                                                         | HBs Ag negative,<br>Should be taken with food                                                |
| TAF <sup>d,f</sup> (or TDF <sup>e</sup> )/FTC + EFV                                               |                                                                                              |
| TAF <sup>d,f</sup> (or TDF <sup>e</sup> )/FTC + RPV                                               | HIV RNA <100,000 copies/mL & CD4 >200 cells/μL,<br>Should be taken with food                 |
| ABC <sup>a,b</sup> /3TC + EFV                                                                     | HBs Ag negative,<br>HIV RNA <100,000 copies/mL                                               |
| <b>Other regimens</b>                                                                             |                                                                                              |
| 2NRTI <sup>f</sup> backbone (including ZDV/3C) + a PI such as unboosted ATV or LPV/r <sup>b</sup> | Unboosted ATV cannot be used with TDF,<br>Unboosted or boosted ATV should be taken with food |

<sup>a</sup>ABC might cause fatal hypersensitivity reactions.

<sup>b</sup>ABC, DRV/r, and LPV/r could increase cardiovascular risk.

<sup>c</sup>DTG might cause neural tube defects in infants. Thus, discuss with your patients the drug's benefits and harms before prescribing DTG, especially if your patients are in the first 12 weeks of pregnancy.

<sup>d</sup>TAF, DTG, and BIC are associated with weight gain.

<sup>e</sup>TDF could cause renal and bone toxicity.

<sup>f</sup>Use 10 mg (not 25 mg) of TAF if used with EVG/c or PI.

HIV, human immunodeficiency virus; ABC, abacavir; 3TC, lamivudine; DTG, dolutegravir; HLA, human leukocyte antigen; HBs Ag, hepatitis B virus surface antigen; TAF, tenofovir alafenamide; FTC, emtricitabine; BIC, bictegravir; TDF, tenofovir disoproxil fumarate; RAL, raltegravir; RNA, ribonucleic acid; DRV/c, darunavir/cobicistat; DRV/r, ritonavir-boosted darunavir; INSTI, integrase strand transfer inhibitor; EVG/c, elvitegravir/cobicistat; ATV/c, atazanavir/cobicistat; ATV/r, ATV/r, atazanavir/ritonavir; EFV, efavirenz; RPV, rilpivirine; CD4, CD4+ T cell counts; ZDV, zidovudine; LPV/r, ritonavir-boosted lopinavir.

## (2) TAF/FTC/BIC (A-I) [27, 28]

TAF/FTC가 포함된 요법으로 HBV 동시 감염 환자에서 HIV와 HBV를 모두 억제할 수 있다.  
TAF, BIC 모두 체중 증가를 유발할 수 있다.

## (3) TAF(or TDF)/FTC + DTG (A-I) [27]

TAF(or TDF)/FTC가 포함된 요법으로 HBV 동시 감염 환자에서 HIV와 HBV를 모두 억제할 수 있다.

TAF, DTG 모두 체중 증가를 유발할 수 있다.

TDF는 골밀도 저하, 신기능 감소 등을 유발할 수 있다.

DTG는 태아의 신경관 결손 빈도를 높이는 것으로 알려져 있다. 따라서 임신 12주 이내의 임산부에게 DTG가 포함된 약제를 투여할 경우에는 이득과 위험에 대해 환자와 상의한 후 투여 여부를 결정한다.

## (4) TAF(or TDF)/FTC + RAL (A-II for TAF, A-I for TDF) [29, 30]

TAF(or TDF)/FTC가 포함된 요법으로 HBV 동시 감염 환자에서 HIV와 HBV를 모두 억제할 수 있다.

이 조합으로 투여할 경우 TAF/FTC는 TAF가 25mg 포함된 제형을 투여해야 한다.

RAL는 400mg tablet을 1알씩 하루 2회 복용하던지, 600mg tablet을 2알씩 하루 1회 복용한다.

TAF는 체중 증가를 유발할 수 있다.

TDF는 골밀도 저하, 신기능 감소 등을 유발할 수 있다.

## (5) 3TC/DTG (A-I) [31]

HIV RNA <500,000 copies/mL인 경우에 고려한다.

HBV 동시 감염 환자에게는 추천되지 않는다.

HIV 약제 내성 돌연변이 여부를 확인한 후에 투여하는 것을 추천한다.

DTG는 태아의 신경관 결손 빈도를 높이는 것으로 알려져 있다. 따라서 임신 12주 이내의 임산부에게 DTG가 포함된 약제를 투여할 경우에는 이득과 위험에 대해 환자와 상의한 후 투여 여부를 결정한다.

DTG는 체중 증가를 유발할 수 있다.

## 2. PI가 포함된 조합

INSTI가 포함된 항레트로바이러스제 조합이 적절하지 않은 경우 DRV/c(or DRV/r)이 포함된 항레트로바이러스제를 고려할 수 있으며, 구체적으로 아래와 같다.

## (1) TAF(or TDF)/FTC + DRV/c(or DRV/r) (A-I) [32, 33]

TAF(or TDF)/FTC가 포함된 요법으로 HBV 동시 감염 환자에서 HIV와 HBV를 모두 억제할 수 있다.

이 조합으로 투여할 경우 TAF/FTC는 TAF가 10mg 포함된 제형을 사용해야 한다.

TAF는 체중 증가를 유발할 수 있다.

TDF는 골밀도 저하, 신기능 감소 등을 유발할 수 있다.

DRV/r은 심혈관계 합병증을 유발할 수 있다.

식사와 함께 복용해야 한다.

**(2) 초치료 환자에서 우선적으로 추천되는 항레트로바이러스제 조합을 사용하기 곤란할 경우 고려할 수 있는 조합은? (Table 3)**

**1. INSTI가 포함된 조합**

**(1) TAF(or TDF)/FTC/EVG/c (B-I) [34, 35]**

TAF (or TDF)/FTC가 포함된 요법으로 HBV 동시 감염 환자에서 HIV와 HBV를 모두 억제할 수 있다.

TAF는 체중 증가를 유발할 수 있다.

TDF는 골밀도 저하, 신기능 감소 등을 유발할 수 있다.

EVG/c는 임신 중반기와 후반기에 혈중 약물 농도 저하가 유발될 수 있으므로, 임신부에게는 추천하지 않는다.

식사와 함께 복용해야 한다.

**(2) ABC/3TC + RAL (B-II) [25]**

ABC는 치명적인 과민반응을 유발할 수 있으며, 이는 HLA-B\*5701과 연관되어 있다.

HBV 동시 감염 환자에게는 상기 약제 조합은 적절하지 않다.

ABC는 심혈관 합병증을 유발할 수 있다는 우려가 있다.

**2. PI가 포함된 조합**

**(1) TAF(or TDF)/FTC + ATV/c(or ATV/r) (B-I) [36, 37]**

TAF (or TDF)/FTC가 포함된 요법으로 HBV 동시 감염 환자에서 HIV와 HBV를 모두 억제할 수 있다.

이 조합으로 투여할 경우 TAF/FTC는 TAF가 10mg 포함된 제형을 사용해야 한다.

TAF는 체중 증가를 유발할 수 있다.

TDF는 골밀도 저하, 신기능 감소 등을 유발할 수 있다.

식사와 함께 복용해야 한다.

**(2) ABC/3TC + DRV/c(or DRV/r) (B-II) [38]**

ABC는 치명적인 과민반응을 유발할 수 있으며, 이는 HLA-B\*5701과 연관되어 있다.

HBV 동시 감염 환자에게는 이 조합은 적절하지 않다.

ABC는 심혈관 합병증을 유발할 수 있다는 우려가 있다.

DRV/r은 심혈관계 합병증을 유발할 수 있다.

식사와 함께 복용해야 한다.

**(3) ABC/3TC + ATV/c(or ATV/r) (B-III for ATV/c and B-I for ATV/r) [39]**

ABC는 치명적인 과민반응을 유발할 수 있으며, 이는 HLA-B\*5701과 연관되어 있다.

HBV 동시 감염 환자에게는 이 조합은 적절하지 않다.

ABC는 심혈관 합병증을 유발할 수 있다는 우려가 있다.

식사와 함께 복용해야 한다.

### 3. NNRTI가 포함된 조합

#### (1) TAF(or TDF)/FTC + EFV (B-II for TAF, B-I for TDF) [39]

TAF (or TDF)/FTC가 포함된 요법으로 HBV 동시 감염 환자에서 HIV와 HBV를 모두 억제할 수 있다.

TAF는 체중 증가를 유발할 수 있다.

TDF는 골밀도 저하, 신기능 감소 등을 유발할 수 있다.

#### (2) TAF(or TDF)/FTC + RPV (B-III for TAF, B-I for TDF) [40]

HIV RNA <100,000 copies/mL이고 CD4+ T 세포수 >200 cells/ $\mu$ L인 경우에 고려한다.

TAF (or TDF)/FTC가 포함된 요법으로 HBV 동시 감염 환자에서 HIV와 HBV를 모두 억제할 수 있다.

TAF는 체중 증가를 유발할 수 있다.

TDF는 골밀도 저하, 신기능 감소 등을 유발할 수 있다.

식사와 함께 복용해야 한다.

#### (3) ABC/3TC + EFV (B-I) [39]

HIV RNA <100,000 copies/mL인 경우에 고려한다.

ABC는 치명적인 과민반응을 유발할 수 있으며, 이는 HLA-B\*5701과 연관되어 있다.

HBV 동시 감염 환자에게는 상기 약제 조합은 적절하지 않다.

ABC는 심혈관 합병증을 유발할 수 있다는 우려가 있다.

### (3) 위에서 언급한 약제 조합을 투여하기 어려운 경우 또는 이미 장기간 부작용이 없이 사용 중인 약물을 지속하려고 할 때에 어떤 약제 조합을 고려해 볼 수 있나?

1. 일반적으로 2NRTI backbone + 3rd agent 형태로 투여하되 여기에 사용할 수 있는 2NRTI backbone으로는 위에서 ABC/3TC, TDF(or TAF)/FTC 이외에 ZDV/3TC를 2NRTI backbone으로 고려할 수 있다 (C-I). 한편, 3rd agent로는 위에서 언급한 PI 이외에 unboosted ATV(with food), LPV/r 등을 고려할 수 있다 (C-I).

2. Unboosted ATV는 TDF와 같이 투여할 경우 약물 상호작용에 ATV의 농도가 저하될 수 있는 문제가 있기 때문에 unboosted ATV를 TDF와 함께 투여하는 것은 피해야 한다 (B-II). Unboosted ATV와 TAF를 같이 투여할 경우 약물 상호작용에 대한 자료는 매우 부족하다. 따라서 꼭 필요한 경우에만 약물동력학 전문가의 자문을 받아서 사용해야 한다 (C-II).

3. LPV/r을 TAF/FTC와 같이 투여할 경우에는 TAF가 10mg 포함된 제형을 사용해야 한다 (B-II).

#### 4) 치료 경험이 있는 환자에서 HAART

##### (1) 항레트로바이러스제 치료 중 낮은 정도의 바이러스 혈증이 발견되면 어떻게 할 것인가?

1. 항레트로바이러스제 투여 24주 후에 혈장 HIV RNA 역가를 50 copies/mL 미만으로 유지하는 것이 바람직하다. 항레트로바이러스제 치료 중 바이러스 혈증이 50 - 200 copies/mL인 상태를 낮은 정도의 바이러스 혈증 상태로 정의한다.
2. 낮은 정도의 바이러스 혈증을 보이는 환자에 대한 접근
  - (1) 약제 순응도를 검토한다.
  - (2) 1~2개월 후에 다시 HIV RNA 역가를 측정한다.
  - (3) 유전형 내성검사 결과를 얻기 어려운 경우라면 이전 항레트로바이러스제 치료력을 토대로 새로운 약제 조합을 고려한다 (A-III).

##### (2) 항레트로바이러스제 치료 중 바이러스적 치료실패에 이른 환자를 어떻게 치료할 것인가?

1. 바이러스적 치료실패의 정의  
항레트로바이러스제 투여 24주 후에 HIV RNA 역가가 200 copies/mL를 초과하는 상태를 바이러스적 치료실패로 정의한다.
2. 바이러스적 치료실패 환자에 대한 접근
  - (1) 항레트로바이러스제 치료력을 검토한다
  - (2) 약제 순응도, 약제 부작용, 약물-약물 상호작용 여부, 음식 섭취로 인한 흡수 저해 가능성 등을 검토한다
  - (3) 약제 내성검사를 시행한다. 약제 내성검사는 가능하면 항레트로바이러스제를 복용 중이거나 중단한지 4주 이내이고 HIV RNA 역가가 1,000 copies/mL을 넘을 때 시행한다 (A-I) [41].
  - (4) 가능하다면 약물농도검사 (Therapeutic drug monitoring)를 시행한다.
  - (5) 가능하면 빠른 시간 내에 항레트로바이러스제를 변경한다. 약제 변경의 목표는 변경 이후 6개월 이내에 다시 HIV RNA 역가를 50 copies/mL 미만으로 감소시키고 이를 유지하는 것이다.
3. 새로운 항레트로바이러스제 조합
  - (1) 바이러스적 치료 실패에 이른 환자의 치료에는 적어도 2가지 이상, 가능하면 3가지의 효과적인 항레트로바이러스제를 추가하는 것을 추천한다 (A-I) [42, 43]. 약제 내성검사를 토대로 감수성이 유지되는 단백분해효소 억제제와 이전에 사용한 적이 없었던 계열의 항레트로바이러스제를 포함하는 것이 바람직하다.
  - (2) 바이러스적 치료 실패에 이른 환자에게 효과적인 항레트로바이러스제 1가지만을 추가하는 것을 추천하지 않는다 (B-I).
  - (3) 바이러스적 치료 실패 상태의 환자에게 항레트로바이러스제를 중단하거나 일시 중지하면 바이러스 역가가 증가하고 CD4+ T 세포수가 감소할 수 있으므로 이를 피해야 한다 (A-I) [44, 45].

(4) 바이러스 억제 실패에 이른 환자이나 바이러스를 최대한 억제하는 것이 불가능한 경우에도 CD4+ T 세포수 감소를 막고 임상적 악화를 막기 위해 부작용을 최소화한 항레트로바이러스제 투여를 유지할 것을 추천한다 (A-I) [46].

### (3) 항레트로바이러스제 치료 중 바이러스는 억제 되었으나 CD4+ T 세포수 반응이 적을 때 어떻게 치료할 것인가?

1. 항레트로바이러스제 투여 후 CD4+ T 세포수는 서서히 증가하는 것이 일반적이다. 하지만 바이러스 혈증이 관찰되지 않으면서 CD4+ T 세포수가 장기간 낮게 (예컨대  $<200/\text{mm}^3$ ) 유지되는 경우 감염질환, 심혈관 질환, 악성 종양, 간질환 등의 발생률이 증가한다.
2. CD4+ T 세포수 반응이 적은 환자에 대한 접근
  - (1) 바이러스 혈증이 관찰되지 않는 환자에게 항레트로바이러스제를 추가하는 것은 추천하지 않는다 (A-I) [47].
  - (2) 바이러스 혈증이 관찰되지 않는 환자에게 CD4+ T 세포수 증가를 목적으로 항레트로바이러스제를 변경하는 것은 추천하지 않는다 (B-III).
  - (3) 바이러스 혈증이 관찰되지 않는 환자에게 CD4+ T 세포수 증가를 목적으로 interleukin-2를 투여하는 것은 추천하지 않는다 (A-I) [48].

## 5) HIV/HBV 및 HIV/HCV 동시감염자의 항레트로바이러스 치료

### (1) HIV/HBV 동시감염 환자에서의 치료 전 평가 및 치료시작 시기는?

1. 항레트로바이러스제 치료 시작 전, 모든 HBsAg 양성 HIV 감염인은 HBV DNA의 양적인 평가가 이루어져야 한다 (A-III).
2. CD4+ T 세포수와 무관하게 모든 HIV/HBV 동시 감염 환자는 HIV와 HBV 모두 치료할 수 있는 항레트로바이러스제 조합으로 치료를 하는 것이 권장된다 (A-II).

### (2) HIV/HBV 동시감염 환자에서는 어떠한 치료제를 선택해야 하는가?

1. FTC, 3TC, TDF, TAF 는 HIV와 HBV 모두에 치료 효과가 있다. 따라서, HIV/HBV 동시 감염 환자에서 항레트로바이러스제를 선택할 시에는 TAF나 TDF에 3TC나 FTC를 조합하는 NRTI 조합을 우선적으로 고려한다 (A-I) [49-51].
2. HBV치료가 필요하나 TDF나 TAF를 사용할 수 없는 경우, 대체요법으로 HBV와 HIV를 둘 다 치료할 수 있도록 HAART와 entecavir를 사용할 수 있다 (B-I). Entecavir의 경우 약한 항 HIV 효과가 있으며 HAART를 시작 하지 않은 상태에서 단독 사용 할 경우 M184V 유전자 돌연변이 (mutation)를 일으키므로, HAART를 시행하지 않고 entecavir를 단독 사용 하는 것은 권장하지 않는다 (A-II) [52].

3. 일부 환자에서는 peginterferon- $\alpha$ 의 단독치료를 병행할 수 있다 (C-II).
4. Adefovir나 telbivudine을 투여하는 것은 권장되지 않는다 (C-II).
5. 항 HBV 효과를 갖는 약제(예, 3TC, entecavir)를 중단해야 할 경우: 항 HBV 효과를 갖는 약제를 중단하는 경우 HBV의 재활성화에 의한 심각한 간세포손상을 초래할 수 있으므로 환자가 자의로 약제를 중단하지 못하게 권유해야 하며 HBV 치료를 중단한 경우 간기능 검사를 자주 실시하면서 임상양상을 관찰해야 한다 (A-II) [53].
6. HIV 치료실패로 항레트로바이러스제를 교체해야 할 경우 혈중 HBV 바이러스가 잘 조절되고 있는 경우이면 HBV 치료에 사용된 약제는 유지하고 다른 항레트로바이러스제를 사용하여 혈중 HIV 억제제를 유도한다 (A-III).

### (3) HIV/HCV 동시감염 환자에서의 치료 전 평가 및 치료시작 시기는?

1. 모든 HIV 감염자에게 HCV 선별검사를 시행해야 하며 매해 반복한다 (A-III).
2. 모든 HIV/HCV동시감염 환자에서 CD4+ T 세포수와 무관하게 항레트로바이러스 치료를 고려한다(A-I) [54, 55].
3. 모든 HIV/HCV 동시 감염환자는 HCV치료를 고려해야 한다. 항 바이러스 치료 전 다음과 같은 평가를 시행한다 (A-I).
  - (1) HCV 유전자형: 항 바이러스 치료전에는 HCV RNA 정량 검사와 HCV 유전자형 및 유전자 아형 (Ia/Ib) 검사를 시행한다 (A-I).
  - (2) 간질환의 중증도 평가: 항바이러스 시작시기 결정과 예후 판정을 위해 간생검을 시행할 수 있고 (B-I), 비침습적 간섬유화 검사를 사용할 수 있다 (B-I).

### (4) HIV/HCV 동시감염 환자에서는 어떠한 치료제를 선택해야 하는가?

1. HAART 치료 경험이 없는 HIV/HCV 동시 감염 환자에서 초 치료 시 약제의 조합은 HIV 단독 감염 환자의 경우와 동일하다 (A-III).
2. HIV/HCV 중복 감염자에서 HCV단독 감염자와 동일하게 치료하되, 인터페론을 사용하지 않는 direct-acting antiviral(DAA)요법을 우선 고려하며, 항레트로바이러스 치료 약제와의 상호작용 여부가 알려진 DAA를 이용한다(B-I).
3. DAA는 다양한 약제와 약물 상호작용을 유발할 수 있으므로 항레트로바이러스 치료제와 약물상호작용을 반드시 유의한다 (A-I).
4. HBV/HCV/HIV동시감염 치료 시 HCV를 DAA로 치료하는 경우, HBV가 재활성화 되는 경우가 있어, 활동성 HBV감염(HBsAg-positive)이 있는 HCV/HIV감염자의 경우 HCV 치료 시작 전, 두 개 이상의 항 HBV효과가 있는 약제(예, TDF나 TAF와 FTC나 3TC의 조합)를 포함하는 항레트로바이러스제 치료가 선행되어야 한다 (A-III) [56, 57].

## 6) 결핵/HIV 동시감염자의 항레트로바이러스 치료

### (1) 결핵/HIV 동시감염자에서 항레트로바이러스 치료 대상은?

1. 결핵/HIV 동시 감염자는 환자의 CD4+ T세포수와 무관하게 항레트로바이러스 치료의 대상이 된다 (A-I).

### (2) 결핵/HIV 동시감염자의 면역상태에 따라 항레트로바이러스제 시작시기는 다른가?

1. 항레트로바이러스 치료를 받고 있었던 환자에서 결핵이 발생할 경우 즉시 적절한 결핵치료를 시작하되 리파마이신과 상호작용을 주의하여 항레트로바이러스 약제의 종류와 용량을 선택한다 (A-II).
2. 항레트로바이러스 치료를 받지 않고 있었던 결핵에 이환된 HIV 감염인에서 CD4+ T세포수에 따른 HAART 시작 시기는 다음과 같다.
  - (1) CD4+ T세포수  $<50$  cells/mm<sup>3</sup>: 결핵 치료를 시작하지 2주 이내에 가능하면 빨리 항레트로바이러스 치료를 시작한다 (A-I) [58-60].
  - (2) CD4+ T세포수  $\geq 50$  cells/mm<sup>3</sup>: 결핵 치료를 시작한 8주 이내에 항레트로바이러스제 치료를 시작한다 (A-I) [61].
  - (3) CD4+ T세포수와 상관없이 임신부의 경우 결핵치료와 함께 태아로의 HIV전파를 막기 위해 가능한 빨리 항레트로바이러스 치료를 시작한다 (A-III).

### (3) 결핵/HIV 동시 감염 치료시 약제상호작용은 무엇을 고려해야 하는가?(Table 4)

1. 리팜핀은 결핵치료에 있어서 핵심적인 약제이나 강력한 CYP450, P-glycoprotein, uridine diphosphate glucuronosyl- transferase 1A1의 유도제로 TAF, INSTI, PI 와 상호작용으로 약제 선택과 변경 시 약제상호작용을 고려해야 한다 (A-III).
2. TAF, BIC, EVG/c, PI, RPV는 리팜핀과 같이 사용하지 않는다 (A-III).
3. 리팜핀 사용시 efavirenz 600 mg사용이 가능하고, INSTI 사용시 DTG 50 mg BID로, RAL 800 mg BID로 증량이 필요하다 (A-II).

### (4) 결핵성 뇌수막염이 있는 HIV 감염인에서 항레트로바이러스 치료 시작 시기는 언제인가?

1. 결핵성 뇌수막염에 대하여 항레트로바이러스제 조기치료를 시행할 때는 약물이상반응 빈도가 높게 보고되어 집중적인 경과 관찰이 필요하다 (A-I).
2. 약물상호작용과 중추신경계 event에 대한 집중감시가 이루어질 수 있다면 2 - 8주 이내에 치료시작을 권고하고, CD4+ T 세포수  $<50$  cells/mm<sup>3</sup>시 2주 내에 치료 시작을 권고한다 (B-III) [22].

**Table 4.** Drug interactions between rifamycin and antiretrovirals

| Rifamycin | Antiretroviral agents         | Effect on antiretroviral agents and/or concomitant antimycobacterial medication                                                                                                                                                                                                                                                  | Dosing recommendations and clinical comments                                                                                                                                                                                                                                                                                                              |
|-----------|-------------------------------|----------------------------------------------------------------------------------------------------------------------------------------------------------------------------------------------------------------------------------------------------------------------------------------------------------------------------------|-----------------------------------------------------------------------------------------------------------------------------------------------------------------------------------------------------------------------------------------------------------------------------------------------------------------------------------------------------------|
| Rifampin  | All PI<br>BIC<br>EVG/c<br>DTG | ↓ PI concentration by >75%<br>BIC AUC ↓ 75%<br>Significant ↓ EVG and cobicistat expected<br>Rifampin with DTG 50 mg twice daily (Compared to DTG 50 mg twice daily alone):<br>DTG AUC ↓ 54% and $C_{min}$ ↓ 72%<br>Rifampin with DTG 50 mg twice daily (Compared to DTG 50 mg daily alone):<br>DTG AUC ↑ 33% and $C_{min}$ ↑ 22% | <b>Contraindicated.</b> Consider rifabutin if a rifamycin is indicated.<br><b>Contraindicated.</b><br><b>Contraindicated.</b><br>Patients without suspected or documented INSTI-resistance mutations:<br>Use DTG 50 mg twice daily suspected or documented INSTI-resistance mutations: Consider an alternative to rifampin, such as rifabutin             |
|           | RAL                           | RAL 400 mg: RAL AUC ↓ 40% and $C_{min}$ ↓ 61%<br>Rifampin with RAL 800 mg twice daily (Compared to RAL 400 mg twice daily alone):<br>RAL AUC ↑ 27% and $C_{min}$ ↓ 53%                                                                                                                                                           | Use RAL 800 mg twice daily instead of 400 mg twice daily.                                                                                                                                                                                                                                                                                                 |
|           | TAF                           | TAF is a P-glycoprotein substrate, its plasma concentrations may be reduced by rifamycin.<br>TAF with rifampin (Compared with TAF Alone):<br>TAF AUC ↓ 55%<br>TFV-DP AUC ↓ 36%                                                                                                                                                   | Do not coadminister RAL 1,200 mg once daily with rifampin.<br><b>Do not coadminister unless benefits outweigh risks.</b><br><br>Intracellular TFV-DP levels are higher when TAF is co-administered with rifampin compared to when TDF is administered alone, but clinical outcomes have not been studied. If co-administered, monitor virologic response. |
|           | RPV                           | RPV AUC ↓ 80%                                                                                                                                                                                                                                                                                                                    | <b>Contraindicated.</b>                                                                                                                                                                                                                                                                                                                                   |
|           | EFV                           | EFV AUC ↓ 26%                                                                                                                                                                                                                                                                                                                    | Maintain EFV dose at 600 mg daily and monitor for virologic response.                                                                                                                                                                                                                                                                                     |
| Rifabutin | DRV/r                         | Compared with rifabutin (300 mg once daily) Alone, Rifabutin (150 mg every other day) plus DRV/r: ↔ rifabutin AUC and metabolite AUC ↑ 881%                                                                                                                                                                                      | Recommended dose is rifabutin 150 mg once daily.<br>Monitor for antimycobacterial activity and consider therapeutic drug monitoring.                                                                                                                                                                                                                      |
|           | PI/c                          | ↑ rifabutin expected<br>↓ cobicistat expected                                                                                                                                                                                                                                                                                    | <b>Do not coadminister.</b>                                                                                                                                                                                                                                                                                                                               |
|           | BIC                           | Rifabutin 300 mg once daily:<br>BIC AUC ↓ 38% and $C_{min}$ ↓ 56%                                                                                                                                                                                                                                                                | <b>Do not coadminister.</b>                                                                                                                                                                                                                                                                                                                               |
|           | DTG                           | Rifabutin 300 mg once daily:<br>↔ DTG AUC and $C_{min}$ ↓ 30%                                                                                                                                                                                                                                                                    | No dose adjustment needed.                                                                                                                                                                                                                                                                                                                                |
|           | EVG/c                         | Rifabutin 150 mg every other day with EVG/c once daily (Compared to Rifabutin 300 mg once daily alone):<br>↔ rifabutin AUC<br>25-O-desacetyl-rifabutin AUC ↑ 625%<br>EVG AUC ↓ 21% and $C_{min}$ ↓ 67%                                                                                                                           | <b>Do not coadminister.</b>                                                                                                                                                                                                                                                                                                                               |
|           | RAL                           | RAL AUC ↑ 19% and $C_{min}$ ↓ 20%                                                                                                                                                                                                                                                                                                | No dose adjustment needed.                                                                                                                                                                                                                                                                                                                                |

AUC, area under the curve; EVG/c, elvitegravir/cobicistat; DTG, dolutegravir;  $C_{min}$ , minimum concentration; INSTI, integrase strand transfer inhibitor; RAL, raltegravir; TAF, tenofovir alafenamide; TFV-DP, tenofovir-diphosphate; RPV, rilpivirine; EFV, efavirenz; DRV/r, ritonavir-boosted darunavir; PI/c, protease inhibitor/cobicistat; BIC, bictegravir; darunavir/ritonavir.

### (5) 면역재건염증후군 (immune reconstitution inflammatory syndrome, IRIS)이 발생하였을 경우 항레트로바이러스 치료를 중단해야 하는가?

1. IRIS는 결핵/HIV 동시감염자의 8%~40%에서 항레트로바이러스제 시작후 수주 이내 발생하는 unmasking IRIS와 3개월 이내에 paradoxical IRIS의 형태로 나타날 수 있다.
2. IRIS 가 발생한 결핵/HIV 동시 감염자에서 항레트로바이러스제, 항결핵제는 중단없이 지속한다 (A-III).
3. 결핵/HIV 동시 감염자에서 IRIS가 발생한 경우, 대증요법을 사용하고, 증상이 심할 경우 corticosteroid를 사용할 수 있다 (A-II).

## 7) HIV 내성검사의 시행 및 활용

### (1) 국내에서 시행할 수 있는 HIV 내성검사의 종류는 어떤 것이 있는가?

1. 유전형 내성검사는 초치료 요법에 대한 치료반응이 불충분하거나 바이러스학적 치료실패를 보이는 경우 시행한다 (A-II). 광범위한 치료 이력이 있어서 기존 자료로 예측할 수 없는 복잡한 내성 돌연변이들의 조합이 발생할 우려가 있는 환자에서는 유전형 내성검사의 바이러스 억제 예측력이 떨어질 수 있어서 표현형 내성검사가 더 우월하지만 국내에서는 활용하기 어렵다.

### (2) 국내에서 치료 미시행자에 대하여 내성검사를 시행해야 하는가?

1. 항레트로바이러스 치료 경험이 없는 환자에서 치료제 결정에 활용하도록 HIV 약제내성 검사를 권고한다 (A-II) [62-65].
2. 항레트로바이러스제 치료가 연기되면 치료개시 시점에 반복 검사를 고려할 수 있다 (C-III) [66].
3. 급성 또는 최근 (초기) HIV 감염자, HIV에 걸린 임산부, HIV 진단 당일 또는 직후에 항레트로바이러스제 치료를 시작하는 경우 내성검사 결과를 기다리기 위해 치료시작을 지연해서는 안되며 치료 시작 후 결과가 보고되면 약제변경 여부를 결정한다 (A-III).
4. 항레트로바이러스 치료 경험이 없는 환자에서 치료제 결정에 활용하는데 있어 표현형 내성검사보다 유전형 내성검사를 선호한다 (A-III).

### (3) 치료 경험이 있는 환자 및 치료실패자에서 내성검사 시행 시 어떤 점을 유의해야 하는가?

1. 항레트로바이러스제를 복용함에도 불충분하게 바이러스가 억제되는 경우 시행한다 (A-II).
2. 혈장 바이러스 농도가 1,000 copies/mL 이상인 바이러스학적 치료실패상태에서 시행한다 (A-I) [41].
3. 가급적 약제 복용 중 검사를 시행해야 하며 중단한 경우 4주 이내에 검사를 시행한다 (A-II) [67-69].
4. 혈장 바이러스 농도가 500 - 1,000 copies/mL인 상태에서 검출되는 내성도 임상적 유용성이 있으나 (B-II), 검사기관에서 자체 정책에 따라 검사를 시행하지 않을 수 있다. 500 copies/mL 미만인 경우에는 안정적인 검사수행이 불가능하므로 내성검사 시행을 권고하지 않는다.
5. 치료 경험이 있는 환자 및 치료실패자에서 약제 중단 후 4주 이상 경과된 시점에 시행한 검사의 결과도 유용할 수 있으나 내성유전자에 대한 선택적 압력의 감소로 잠재된 내성유전자 돌연변이가 검출되지 않을 수 있다 (C-III).

#### (4) 내성검사 결과를 해석할 때 어떠한 점을 유의해야 하는가?

1. 치료 경험이 있는 환자 및 치료실패자에서는 약제 변경시점의 내성검사 결과 외에도 가급적 이전에 시행한 모든 내성검사결과를 고려해 약제의 종류를 결정하는 것이 필요하다 (A-III). 광범위한 치료 이력이 있는 환자의 경우 유전형 내성검사의 예측력이 떨어질 수 있다.

### 8) 임신부의 항레트로바이러스 치료

#### (1) HIV 감염자의 임신 전 관리는 어떻게 해야 하는가?

1. 모든 여성 HIV 감염자는 건강을 회복하고 성접촉을 통한 전파를 줄이기 위해서 항레트로바이러스제를 복용해야 한다 (A-I) [14, 16].
2. 가임기의 HIV 감염 여자 환자를 진료하는 의사는 의도하지 않은 임신과 태아에 대한 전파 가능성을 줄이기 위해서 가족 계획과 피임에 대한 상담을 제공해야 한다 (A-I) [70-72].
3. 임신을 고려하고 있는 모든 HIV 감염자는 HAART 치료를 받아야 하며, HIV RNA가 검출되지 않는 수준으로 최대한 억제된 이후에 임신을 해야 한다 (A-I) [73, 74].

#### (2) 분만 전 임신 기간 중 항레트로바이러스제 치료는 어떻게 해야 하는가?

1. 모든 HIV 감염 임신부는 임상적, 바이러스적 또는 면역학적 상태와 상관없이 가능한 빨리 HAART를 받도록 권고한다 (A-I) [75-79].
2. HIV 감염 임신부는 임신중 항레트로바이러스제 치료의 이점과 각 약제의 위험성에 대해서 충분히 설명을 듣고 상담할 수 있는 기회를 제공받아야 한다 (A-III).
3. 항레트로바이러스제 치료가 임신부의 건강과 태아에 대한 전파억제의 이점이 크기 때문에 치료를 중단하거나 연기하지 말고 임신 기간동안 유지해야 한다 (A-I) [78, 79].
4. 항레트로바이러스제 치료 시작 전에 내성검사를 시행해야 하며, 내성검사 결과를 확인하기 위해서 치료 시작을 지연하지는 말아야 한다 (A-II) [80, 81].
5. 항레트로바이러스제 치료 중 HIV RNA 역가가 500 - 1,000 copies/mL 이상으로 증가한 임신부는 약제 변경 전에 내성검사를 시행해야 한다 (A-III).

#### (3) HIV 감염 임신부에게 어떤 종류의 항레트로바이러스제 치료가 권장되는가? (Table 5)

1. HAART의 약제를 선택할 때에는 태아에 대한 영향 뿐 아니라 임신과 관련된 약동학적 특성(pharmacokinetics), 임신부에서 임상경험 유무, 동반질환, 약물상호작용, 약제내성, 순응도 등의 다양한 요인을 고려해서 결정해야 한다 (A-III). 구체적인 약제 선택은 Table 5을 참조한다.

**Table 5.** Antiretroviral recommendations in treatment-naïve HIV-infected women

| Classes | Preferred agents                                       | Alternative agents                         | Comments                                                                                                                                                                                                                                                                                                                                                                                            |
|---------|--------------------------------------------------------|--------------------------------------------|-----------------------------------------------------------------------------------------------------------------------------------------------------------------------------------------------------------------------------------------------------------------------------------------------------------------------------------------------------------------------------------------------------|
| NRTI    | Abacavir/lamivudine, TDF/emtricitabine, TDF/lamivudine | Zidovudine/lamivudine<br>TAF/emtricitabine | Although data are limited, TAF plasma concentrations in pregnant women are similar to those seen in non-pregnant adults.                                                                                                                                                                                                                                                                            |
| NNRTI   | -                                                      | Efavirenz<br>Ralpivirine                   | Although birth defects have been reported in animal studies of efavirenz, there has been no evidence of an increased risk for efavirenz-related birth defects in human pregnancy.<br>Etravirine is not recommended because of limited information regarding its use in pregnant women.                                                                                                              |
| PI      | Atazanavir/ritonavir, Darunavir/ritonavir              | -                                          | Lopinavir/ritonavir is not recommended except in special circumstances, since it may increase the risk of preterm delivery and cause significant nausea compared to preferred/alternative agents.<br>Cobicistat-boosted PI agents are not recommended except in special circumstances, because of potential low drug levels and the occurrence of viral rebound in the second and third trimesters. |
| ITSTI   | Raltegravir, Dolutegravir                              | -                                          | Elvitegravir/cobicistat is not recommended because of limited information regarding its use and inadequate levels of elvitegravir and cobicistat in the second and third trimesters.                                                                                                                                                                                                                |

HIV, human immunodeficiency virus; NRTI, nucleoside reverse transcriptase inhibitor; TDF, tenofovir disoproxil fumarate; TAF, tenofovir alafenamide; -NNRTI, non-nucleoside reverse transcriptase inhibitor; PI, protease inhibitor; INSTI, integrase strand transfer inhibitor.

#### (4) HIV 감염 임신부는 어떤 방법으로 분만을 해야 하는가?

1. 임신 34–36주에 HIV RNA 정량검사 결과 혈중 HIV RNA 역가가 1,000 copies/mL 초과로 높은 임신부는 항레트로바이러스제 복용여부와 상관없이 임신 38주에 계획된 제왕절개 수술을 시행해서 태아에 대한 전파 가능성을 최소화해야 한다 (A-II) [82]. HIV RNA 역가가 1,000 copies/mL 이하의 임신부는 일반적인 표준 분만 지침을 따른다.
2. 임신 34–36주 이후(또는 분만 4–6주 이내)의 HIV RNA 역가를 모르는 임신부는 미리 계획하여서 제왕절개 분만을 시행해야 한다 (A-II) [83, 84].

#### (5) 분만 중 항레트로바이러스제 치료는 어떻게 해야 하는가?

1. HIV RNA 역가를 모르거나 1,000 copies/mL 초과인 임신부는 분만 시에 zidovudine 정맥투여를 시행해야 한다 (A-II) [85].
2. 항레트로바이러스제를 복용 중으로 임신 34–36주 이후(또는 분만 4–6주 이내)의 HIV RNA 역가가 1,000 copies/mL 미만인 임신부는 바이러스 역가와 항레트로바이러스제 복용 순응도 등을 고려해서 분만시 항레트로바이러스 정맥 투여 여부를 결정한다. 항레트로바이러스제 복용 순응도가 높고, 바이러스 역가가 50 copies/mL 미만으로 잘 억제된 임신부는 분만 시의 zidovudine 정맥투여를 생략할 수 있으며 분만 전후에도 경구 항레트로바이러스제 치료를 계속 유지해야 한다 (B-II) [85, 86]. HIV RNA 역가가 50–1,000 copies/mL인 임신부는 항레트로바이러스제 순응도를 고려해서 분만시 zidovudine 정맥투여 여부를 결정해야 한다 (C-II) [85, 87].

### (6) 분만 후 처치는 어떻게 해야 하는가?

1. 항레트로바이러스제 복용 여부와 상관없이 모든 HIV 감염 임산부는 신생아에 대한 전파 우려가 있으므로 모유 수유를 피해야 한다 (A-II) [88].
2. 출산 전후 예방적 항레트로바이러스제 투여 여부와 상관없이 HIV 감염 임신부로부터 태어난 모든 신생아는 항레트로바이러스제 예방요법을 받아야 한다 (A-I) [89, 90].
3. 신생아에 대한 항레트로바이러스제 치료는 분만 후 6시간 이내에 가능한 빨리 시작해야 한다 (A-II) [89, 90].

## REFERENCES

1. Korean Society for AIDS. The 2018 clinical guidelines for the diagnosis and treatment of HIV/AIDS in HIV-infected Koreans. Infect Chemother 2019;51:77-88.  
[PUBMED](#) | [CROSSREF](#)
2. Clinical Info HIV. gov. Guidelines for the use of antiretroviral agents in adults and adolescents living with HIV. Available at: <https://clinicalinfo.hiv.gov/en/guidelines/adult-and-adolescent-arv/whats-new-guidelines>. Accessed 1 May 2021.
3. Mellors JW, Muñoz A, Giorgi JV, Margolick JB, Tassoni CJ, Gupta P, Kingsley LA, Todd JA, Saah AJ, Detels R, Phair JP, Rinaldo CR Jr. Plasma viral load and CD4+ lymphocytes as prognostic markers of HIV-1 infection. Ann Intern Med 1997;126:946-54.  
[PUBMED](#) | [CROSSREF](#)
4. European AIDS Clinical Society (EACS). European AIDS Clinical Society (EACS) Guidelines for the management of people living with HIV (PLWH) in Europe. Version 10.1. October 2020. Available at: [https://www.eacsociety.org/files/guidelines-10.1\\_30032021\\_1.pdf](https://www.eacsociety.org/files/guidelines-10.1_30032021_1.pdf). Accessed 1 May 2021.
5. Freedberg KA, Malaban A, Samet JH, Libman H. Initial assessment of patients infected with human immunodeficiency virus: the yield and cost of laboratory testing. J Acquir Immune Defic Syndr (1988) 1994;7:1134-40.  
[PUBMED](#)
6. CLINICAL INFO. HIV.gov. Guidelines for the prevention and treatment of opportunistic infections in adults and adolescents with HIV. Available at: <https://clinicalinfo.hiv.gov/en/guidelines/adult-and-adolescent-opportunistic-infection/whats-new-guidelines>. Accessed 1 May 2021.
7. Brogly SB, Watts DH, Ylitalo N, Franco EL, Seage GR 3rd, Oleske J, Eagle M, Van Dyke R. Reproductive health of adolescent girls perinatally infected with HIV. Am J Public Health 2007;97:1047-52.  
[PUBMED](#) | [CROSSREF](#)
8. Centers for Disease Control and Prevention. Recommendations for HIV prevention with adults and adolescents with HIV in the United States, 2014. Available at: <https://stacks.cdc.gov/view/cdc/44064>. Accessed 1 May 2021.
9. Girard PM, Nelson M, Mohammed P, Hill A, van Delft Y, Moecklinghoff C. Can we stop CD4+ testing in patients with HIV-1 RNA suppression on antiretroviral treatment? AIDS 2013;27:2759-63.  
[PUBMED](#) | [CROSSREF](#)
10. Anonymous ; HIV Surrogate Marker Collaborative Group. Human immunodeficiency virus type 1 RNA level and CD4 count as prognostic markers and surrogate end points: a meta-analysis. AIDS Res Hum Retroviruses 2000;16:1123-33.  
[PUBMED](#) | [CROSSREF](#)
11. Lucas GM, Ross MJ, Stock PG, Shlipak MG, Wyatt CM, Gupta SK, Atta MG, Wools-Kaloustian KK, Pham PA, Bruggeman LA, Lennox JL, Ray PE, Kalayjian RC; HIV Medicine Association of the Infectious Diseases Society of America. Clinical practice guideline for the management of chronic kidney disease in patients infected with HIV: 2014 update by the HIV Medicine Association of the Infectious Diseases Society of America. Clin Infect Dis 2014;59:e96-138.  
[PUBMED](#) | [CROSSREF](#)
12. Aberg JA, Kaplan JE, Libman H, Emmanuel P, Anderson JR, Stone VE, Oleske JM, Currier JS, Gallant JE; HIV Medicine Association of the Infectious Diseases Society of America. Primary care guidelines for the

- management of persons infected with human immunodeficiency virus: 2009 update by the HIV medicine Association of the Infectious Diseases Society of America. *Clin Infect Dis* 2009;49:651-81.  
[PUBMED](#) | [CROSSREF](#)
13. Kaplan JE, Masur H, Holmes KK; USPHS; Infectious Disease Society of America. Guidelines for preventing opportunistic infections among HIV-infected persons--2002. Recommendations of the U.S. Public Health Service and the Infectious Diseases Society of America. *MMWR Recomm Rep* 2002;51:1-52.  
[PUBMED](#)
  14. Hogg RS, Yip B, Chan KJ, Wood E, Craib KJ, O'Shaughnessy MV, Montaner JS. Rates of disease progression by baseline CD4 cell count and viral load after initiating triple-drug therapy. *JAMA* 2001;286:2568-77.  
[PUBMED](#) | [CROSSREF](#)
  15. Mocroft A, Vella S, Benfield TL, Chiesi A, Miller V, Gargalianos P, d'Arminio Monforte A, Yust I, Bruun JN, Phillips AN, Lundgren JD. Changing patterns of mortality across Europe in patients infected with HIV-1. EuroSIDA Study Group. *Lancet* 1998;352:1725-30.  
[PUBMED](#) | [CROSSREF](#)
  16. Palella FJ Jr, Deloria-Knoll M, Chmiel JS, Moorman AC, Wood KC, Greenberg AE, Holmberg SD; HIV Outpatient Study Investigators. Survival benefit of initiating antiretroviral therapy in HIV-infected persons in different CD4+ cell strata. *Ann Intern Med* 2003;138:620-6.  
[PUBMED](#) | [CROSSREF](#)
  17. When To Start Consortium. Sterne JA, May M, Costagliola D, de Wolf F, Phillips AN, Harris R, Funk MJ, Geskus RB, Gill J, Dabis F, Miró JM, Justice AC, Ledergerber B, Fätkenheuer G, Hogg RS, Monforte AD, Saag M, Smith C, Staszewski S, Egger M, Cole SR. Timing of initiation of antiretroviral therapy in AIDS-free HIV-1-infected patients: a collaborative analysis of 18 HIV cohort studies. *Lancet* 2009;373:1352-63.
  18. Strategies for Management of Antiretroviral Therapy (SMART) Study Group. Emery S, Neuhaus JA, Phillips AN, Babiker A, Cohen CJ, Gatell JM, Girard PM, Grund B, Law M, Losso MH, Palfreeman A, Wood R. Major clinical outcomes in antiretroviral therapy (ART)-naïve participants and in those not receiving ART at baseline in the SMART study. *J Infect Dis* 2008;197:1133-44.  
[CROSSREF](#)
  19. Cohen MS, Chen YQ, McCauley M, Gamble T, Hosseinipour MC, Kumarasamy N, Hakim JG, Kumwenda J, Grinsztejn B, Pilotto JH, Godbole SV, Mehendale S, Chariyalertsak S, Santos BR, Mayer KH, Hoffman IF, Eshleman SH, Piwowar-Manning E, Wang L, Makhema J, Mills LA, de Bruyn G, Sanne I, Eron J, Gallant J, Havlir D, Swindells S, Ribaud H, Elharrar V, Burns D, Taha TE, Nielsen-Saines K, Celentano D, Essex M, Fleming TR; HPTN 052 Study Team. Prevention of HIV-1 infection with early antiretroviral therapy. *N Engl J Med* 2011;365:493-505.  
[PUBMED](#) | [CROSSREF](#)
  20. Labhardt ND, Ringera I, Lejone TI, Klimkait T, Muhairwe J, Amstutz A, Glass TR. Effect of offering same-day ART vs usual health facility referral during home-based HIV testing on linkage to care and viral suppression among adults with HIV in Lesotho: The CASCADE randomized clinical trial. *JAMA* 2018;319:1103-12.  
[PUBMED](#) | [CROSSREF](#)
  21. Coffey S, Bacchetti P, Sachdev D, Bacon O, Jones D, Ospina-Norvell C, Torres S, Lynch E, Camp C, Mercer-Slomoff R, Lee S, Christopoulos K, Pilcher C, Hsu L, Jin C, Scheer S, Havlir D, Gandhi M. RAPID antiretroviral therapy: high virologic suppression rates with immediate antiretroviral therapy initiation in a vulnerable urban clinic population. *AIDS* 2019;33:825-32.  
[PUBMED](#) | [CROSSREF](#)
  22. Török ME, Yen NT, Chau TT, Mai NT, Phu NH, Mai PP, Dung NT, Chau NV, Bang ND, Tien NA, Minh NH, Hien NQ, Thai PV, Dong DT, Anh DT, Thoa NT, Hai NN, Lan NN, Lan NT, Quy HT, Dung NH, Hien TT, Chinh NT, Simmons CP, de Jong M, Wolbers M, Farrar JJ. Timing of initiation of antiretroviral therapy in human immunodeficiency virus (HIV)--associated tuberculous meningitis. *Clin Infect Dis* 2011;52:1374-83.  
[PUBMED](#) | [CROSSREF](#)
  23. Boulware DR, Meya DB, Muzoora C, Rolfes MA, Huppler Hullsiek K, Musubire A, Taseera K, Nabeta HW, Schutz C, Williams DA, Rajasingham R, Rhein J, Thienemann F, Lo MW, Nielsen K, Bergemann TL, Kambugu A, Manabe YC, Janoff EN, Bohjanen PR, Meintjes G; COAT Trial Team. Timing of antiretroviral therapy after diagnosis of cryptococcal meningitis. *N Engl J Med* 2014;370:2487-98.  
[PUBMED](#) | [CROSSREF](#)
  24. Molina JM, Clotet B, van Lunzen J, Lazzarin A, Cavassini M, Henry K, Kulagin V, Givens N, Brennan C, de Oliveira CF. Once-daily dolutegravir is superior to once-daily darunavir/ritonavir in treatment-naïve HIV-1-positive individuals: 96 week results from FLAMINGO. *J Int AIDS Soc* 2014;17(4 Suppl 3):19490.  
[PUBMED](#) | [CROSSREF](#)
  25. Raffi F, Jaeger H, Quiros-Roldan E, Albrecht H, Belonosova E, Gatell JM, Baril JG, Domingo P, Brennan C, Almond S, Min S; extended SPRING-2 Study Group. Once-daily dolutegravir versus twice-daily raltegravir

- in antiretroviral-naïve adults with HIV-1 infection (SPRING-2 study): 96 week results from a randomised, double-blind, non-inferiority trial. *Lancet Infect Dis* 2013;13:927-35.  
[PUBMED](#) | [CROSSREF](#)
26. Gallant J, Lazzarin A, Mills A, Orkin C, Podzamczar D, Tebas P, Girard PM, Brar I, Daar ES, Wohl D, Rockstroh J, Wei X, Custodio J, White K, Martin H, Cheng A, Quirk E. Bictegravir, emtricitabine, and tenofovir alafenamide versus dolutegravir, abacavir, and lamivudine for initial treatment of HIV-1 infection (GS-US-380-1489): a double-blind, multicentre, phase 3, randomised controlled non-inferiority trial. *Lancet* 2017;390:2063-72.  
[PUBMED](#) | [CROSSREF](#)
  27. Stellbrink HJ, Arribas JR, Stephens JL, Albrecht H, Sax PE, Maggiolo F, Creticos C, Martorell CT, Wei X, Acosta R, Collins SE, Brainard D, Martin H. Co-formulated bictegravir, emtricitabine, and tenofovir alafenamide versus dolutegravir with emtricitabine and tenofovir alafenamide for initial treatment of HIV-1 infection: week 96 results from a randomised, double-blind, multicentre, phase 3, non-inferiority trial. *Lancet HIV* 2019;6:e364-72.  
[PUBMED](#) | [CROSSREF](#)
  28. Wohl DA, Yazdanpanah Y, Baumgarten A, Clarke A, Thompson MA, Brinson C, Hagins D, Ramgopal MN, Antinori A, Wei X, Acosta R, Collins SE, Brainard D, Martin H. Bictegravir combined with emtricitabine and tenofovir alafenamide versus dolutegravir, abacavir, and lamivudine for initial treatment of HIV-1 infection: week 96 results from a randomised, double-blind, multicentre, phase 3, non-inferiority trial. *Lancet HIV* 2019;6:e355-63.  
[PUBMED](#) | [CROSSREF](#)
  29. Rockstroh JK, DeJesus E, Lennox JL, Yazdanpanah Y, Saag MS, Wan H, Rodgers AJ, Walker ML, Miller M, DiNubile MJ, Nguyen BY, Teppler H, Leavitt R, Sklar P; STARTMRK Investigators. Durable efficacy and safety of raltegravir versus efavirenz when combined with tenofovir/emtricitabine in treatment-naïve HIV-1-infected patients: final 5-year results from STARTMRK. *J Acquir Immune Defic Syndr* 2013;63:77-85.  
[PUBMED](#) | [CROSSREF](#)
  30. Cahn P, Sax PE, Squires K, Molina JM, Ratanasuwan W, Rassool M, Bloch M, Xu X, Zhou Y, Homony B, Hepler D, Teppler H, Hanna GJ, Nguyen BY, Greaves W; ONCEMRK study group. Raltegravir 1200 mg once daily vs 400 mg twice daily, with emtricitabine and tenofovir disoproxil fumarate, for previously untreated HIV-1 infection: Week 96 results from ONCEMRK, a randomized, double-blind, noninferiority trial. *J Acquir Immune Defic Syndr* 2018;78:589-98.  
[PUBMED](#) | [CROSSREF](#)
  31. Cahn P, Madero JS, Arribas JR, Antinori A, Ortiz R, Clarke AE, Hung CC, Rockstroh JK, Girard PM, Sievers J, Man CY, Urbaitte R, Brandon DJ, Underwood M, Tenorio AR, Pappa KA, Wynne B, Gartland M, Aboud M, van Wyk J, Smith KY. Durable efficacy of dolutegravir plus lamivudine in antiretroviral treatment-naïve adults with HIV-1 infection: 96-week results from the GEMINI-1 and GEMINI-2 randomized clinical trials. *J Acquir Immune Defic Syndr* 2020;83:310-8.  
[PUBMED](#) | [CROSSREF](#)
  32. Orkin C, DeJesus E, Khanlou H, Stoeckl A, Supparatpinyo K, Lathouwers E, Lefebvre E, Opsomer M, Van de Casteele T, Tomaka F. Final 192-week efficacy and safety of once-daily darunavir/ritonavir compared with lopinavir/ritonavir in HIV-1-infected treatment-naïve patients in the ARTEMIS trial. *HIV Med* 2013;14:49-59.  
[PUBMED](#) | [CROSSREF](#)
  33. Orkin C, Eron JJ, Rockstroh J, Podzamczar D, Esser S, Vandekerckhove L, Van Landuyt E, Lathouwers E, Hufkens V, Jezorwski J, Opsomer M; AMBER study group. Week 96 results of a phase 3 trial of darunavir/cobicistat/emtricitabine/tenofovir alafenamide in treatment-naïve HIV-1 patients. *AIDS* 2020;34:707-18.  
[PUBMED](#) | [CROSSREF](#)
  34. Wohl DA, Cohen C, Gallant JE, Mills A, Sax PE, DeJesus E, Zolopa A, Liu HC, Plummer A, White KL, Cheng AK, Rhee MS, Szwarcberg J; GS-US-236-0102 Study Team. A randomized, double-blind comparison of single-tablet regimen elvitegravir/cobicistat/emtricitabine/tenofovir DF versus single-tablet regimen efavirenz/emtricitabine/tenofovir DF for initial treatment of HIV-1 infection: analysis of week 144 results. *J Acquir Immune Defic Syndr* 2014;65:e118-20.  
[PUBMED](#) | [CROSSREF](#)
  35. Clumeck N, Molina JM, Henry K, Gathe J, Rockstroh JK, DeJesus E, Wei X, White K, Fordyce MW, Rhee MS, Szwarcberg J; GS-236-0103 Study Team. A randomized, double-blind comparison of single-tablet regimen elvitegravir/cobicistat/emtricitabine/tenofovir DF vs ritonavir-boosted atazanavir plus emtricitabine/tenofovir DF for initial treatment of HIV-1 infection: analysis of week 144 results. *J Acquir Immune Defic Syndr* 2014;65:e121-4.  
[PUBMED](#) | [CROSSREF](#)
  36. Molina JM, Andrade-Villanueva J, Echevarria J, Chetchotisakd P, Corral J, David N, Moyle G, Mancini M, Percival L, Yang R, Wirtz V, Lataillade M, Absalon J, McGrath D; CASTLE Study Team. Once-daily

- atazanavir/ritonavir compared with twice-daily lopinavir/ritonavir, each in combination with tenofovir and emtricitabine, for management of antiretroviral-naïve HIV-1-infected patients: 96-week efficacy and safety results of the CASTLE study. *J Acquir Immune Defic Syndr* 2010;53:323-32.
- [PUBMED](#) | [CROSSREF](#)
37. Gallant JE, Koenig E, Andrade-Villanueva J, Chetchotisakd P, DeJesus E, Antunes F, Arastéh K, Moyle G, Rizzardini G, Fehr J, Liu Y, Zhong L, Callebaut C, Szwarcberg J, Rhee MS, Cheng AK. Cobicistat versus ritonavir as a pharmacoenhancer of atazanavir plus emtricitabine/tenofovir disoproxil fumarate in treatment-naïve HIV type 1-infected patients: week 48 results. *J Infect Dis* 2013;208:32-9.

[PUBMED](#) | [CROSSREF](#)

  38. Molina JM, Clotet B, van Lunzen J, Lazzarin A, Cavassini M, Henry K, Kulagin V, Givens N, de Oliveira CF, Brennan C; FLAMINGO study team. Once-daily dolutegravir versus darunavir plus ritonavir for treatment-naïve adults with HIV-1 infection (FLAMINGO): 96 week results from a randomised, open-label, phase 3b study. *Lancet HIV* 2015;2:e127-36.

[PUBMED](#) | [CROSSREF](#)

  39. Daar ES, Tierney C, Fischl MA, Sax PE, Mollan K, Budhathoki C, Godfrey C, Jahed NC, Myers L, Katzenstein D, Farajallah A, Rooney JE, Pappa KA, Woodward WC, Patterson K, Bolivar H, Benson CA, Collier AC; AIDS Clinical Trials Group Study A5202 Team. Atazanavir plus ritonavir or efavirenz as part of a 3-drug regimen for initial treatment of HIV-1. *Ann Intern Med* 2011;154:445-56.

[PUBMED](#) | [CROSSREF](#)

  40. van Lunzen J, Antinori A, Cohen CJ, Arribas JR, Wohl DA, Rieger A, Rachlis A, Bloch M, Segal-Maurer S, Garner W, Porter D, Bosse M, Piontkowsky D, Chuck SK, De-Oertel S. Rilpivirine vs. efavirenz-based single-tablet regimens in treatment-naïve adults: week 96 efficacy and safety from a randomized phase 3b study. *AIDS* 2016;30:251-9.

[PUBMED](#) | [CROSSREF](#)

  41. Palella FJ Jr, Armon C, Buchacz K, Cole SR, Chmiel JS, Novak RM, Wood K, Moorman AC, Brooks JT; HOPS (HIV Outpatient Study) Investigators. The association of HIV susceptibility testing with survival among HIV-infected patients receiving antiretroviral therapy: a cohort study. *Ann Intern Med* 2009;151:73-84.

[PUBMED](#) | [CROSSREF](#)

  42. Cahn P, Pozniak AL, Mingrone H, Shuldyakov A, Brites C, Andrade-Villanueva JF, Richmond G, Buendia CB, Fourie J, Ramgopal M, Hagins D, Felizarta F, Madruga J, Reuter T, Newman T, Small CB, Lombaard J, Grinsztejn B, Dorey D, Underwood M, Griffith S, Min S; extended SAILING Study Team. Dolutegravir versus raltegravir in antiretroviral-experienced, integrase-inhibitor-naïve adults with HIV: week 48 results from the randomised, double-blind, non-inferiority SAILING study. *Lancet* 2013;382:700-8.

[PUBMED](#) | [CROSSREF](#)

  43. Eron JJ, Cooper DA, Steigbigel RT, Clotet B, Gatell JM, Kumar PN, Rockstroh JK, Schechter M, Markowitz M, Yeni P, Loutfy MR, Lazzarin A, Lennox JL, Strohmaier KM, Wan H, Barnard RJ, Nguyen BY, Teppler H; BENCHMRK Study Teams. Efficacy and safety of raltegravir for treatment of HIV for 5 years in the BENCHMRK studies: final results of two randomised, placebo-controlled trials. *Lancet Infect Dis* 2013;13:587-96.

[PUBMED](#) | [CROSSREF](#)

  44. Lawrence J, Mayers DL, Hullsiek KH, Collins G, Abrams DI, Reisler RB, Crane LR, Schmetter BS, Dionne TJ, Saldanha JM, Jones MC, Baxter JD; 064 Study Team of the Terry Bein Community Programs for Clinical Research on AIDS. Structured treatment interruption in patients with multidrug-resistant human immunodeficiency virus. *N Engl J Med* 2003;349:837-46.

[PUBMED](#) | [CROSSREF](#)

  45. Deeks SG, Wrin T, Liegler T, Hoh R, Hayden M, Barbour JD, Hellmann NS, Petropoulos CJ, McCune JM, Hellerstein MK, Grant RM. Virologic and immunologic consequences of discontinuing combination antiretroviral-drug therapy in HIV-infected patients with detectable viremia. *N Engl J Med* 2001;344:472-80.

[PUBMED](#) | [CROSSREF](#)

  46. Ledergerber B, Lundgren JD, Walker AS, Sabin C, Justice A, Reiss P, Mussini C, Wit F, d'Arminio Monforte A, Weber R, Fusco G, Staszewski S, Law M, Hogg R, Lampe F, Gill MJ, Castelli F, Phillips AN; PLATO Collaboration. Predictors of trend in CD4-positive T-cell count and mortality among HIV-1-infected individuals with virological failure to all three antiretroviral-drug classes. *Lancet* 2004;364:51-62.

[PUBMED](#) | [CROSSREF](#)

  47. Dinoso JB, Kim SY, Wiegand AM, Palmer SE, Gange SJ, Cranmer L, O'Shea A, Callender M, Spivak A, Brennan T, Kearney MF, Proschan MA, Mican JM, Rehm CA, Coffin JM, Mellors JW, Siliciano RF, Maldarelli F. Treatment intensification does not reduce residual HIV-1 viremia in patients on highly active antiretroviral therapy. *Proc Natl Acad Sci U S A* 2009;106:9403-8.

[PUBMED](#) | [CROSSREF](#)

48. INSIGHT-ESPRIT Study Group; SILCAAT Scientific Committee. Abrams D, Lévy Y, Losso MH, Babiker A, Collins G, Cooper DA, Darbyshire J, Emery S, Fox L, Gordin F, Lane HC, Lundgren JD, Mitsuyasu R, Neaton JD, Phillips A, Routy JP, Tambussi G, Wentworth D. Interleukin-2 therapy in patients with HIV infection. *N Engl J Med* 2009;361:1548-59.
49. Peters MG, Andersen J, Lynch P, Liu T, Alston-Smith B, Brosgart CL, Jacobson JM, Johnson VA, Pollard RB, Rooney JF, Sherman KE, Swindells S, Polsky B; ACTG Protocol A5127 Team. Randomized controlled study of tenofovir and adefovir in chronic hepatitis B virus and HIV infection: ACTG A5127. *Hepatology* 2006;44:1110-6.  
[PUBMED](#) | [CROSSREF](#)
50. de Vries-Sluijs TE, Reijnders JG, Hansen BE, Zaaier HL, Prins JM, Pas SD, Schutten M, Hoepelman AI, Richter C, Mulder JW, de Man RA, Janssen HL, van der Ende ME. Long-term therapy with tenofovir is effective for patients co-infected with human immunodeficiency virus and hepatitis B virus. *Gastroenterology* 2010;139:1934-41.  
[PUBMED](#) | [CROSSREF](#)
51. Matthews GV, Seaberg E, Dore GJ, Bowden S, Lewin SR, Sasadeusz J, Marks P, Goodman Z, Philp FH, Tang Y, Locarnini S, Thio CL. Combination HBV therapy is linked to greater HBV DNA suppression in a cohort of lamivudine-experienced HIV/HBV coinfecting individuals. *AIDS* 2009;23:1707-15.  
[PUBMED](#) | [CROSSREF](#)
52. McMahon MA, Jilek BL, Brennan TP, Shen L, Zhou Y, Wind-Rotolo M, Xing S, Bhat S, Hale B, Hegarty R, Chong CR, Liu JO, Siliciano RF, Thio CL. The HBV drug entecavir - effects on HIV-1 replication and resistance. *N Engl J Med* 2007;356:2614-21.  
[PUBMED](#) | [CROSSREF](#)
53. Dore GJ, Soriano V, Rockstroh J, Kupfer B, Tedaldi E, Peters L, Neuhaus J, Puoti M, Klein MB, Mocroft A, Clotet B, Lundgren JD; SMART INSIGHT study group. Frequent hepatitis B virus rebound among HIV-hepatitis B virus-coinfecting patients following antiretroviral therapy interruption. *AIDS* 2010;24:857-65.  
[PUBMED](#) | [CROSSREF](#)
54. Macías J, Berenguer J, Japón MA, Girón JA, Rivero A, López-Cortés LF, Moreno A, González-Serrano M, Iribarren JA, Ortega E, Miralles P, Mira JA, Pineda JA. Fast fibrosis progression between repeated liver biopsies in patients coinfecting with human immunodeficiency virus/hepatitis C virus. *Hepatology* 2009;50:1056-63.  
[PUBMED](#) | [CROSSREF](#)
55. Ragni MV, Nalesnik MA, Schillo R, Dang Q. Highly active antiretroviral therapy improves ESLD-free survival in HIV-HCV co-infection. *Haemophilia* 2009;15:552-8.  
[PUBMED](#) | [CROSSREF](#)
56. Bersoff-Matcha SJ, Cao K, Jason M, Ajao A, Jones SC, Meyer T, Brinker A. Hepatitis B Virus Reactivation Associated With Direct-Acting Antiviral Therapy for Chronic Hepatitis C Virus: a review of cases reported to the U.S. Food and Drug Administration adverse event reporting system. *Ann Intern Med* 2017;166:792-8.  
[PUBMED](#) | [CROSSREF](#)
57. Wang C, Ji D, Chen J, Shao Q, Li B, Liu J, Wu V, Wong A, Wang Y, Zhang X, Lu L, Wong C, Tsang S, Zhang Z, Sun J, Hou J, Chen G, Lau G. Hepatitis due to Reactivation of Hepatitis B Virus in Endemic Areas Among Patients With Hepatitis C Treated With Direct-acting Antiviral Agents. *Clin Gastroenterol Hepatol* 2017;15:132-6.  
[PUBMED](#) | [CROSSREF](#)
58. Blanc FX, Sok T, Laureillard D, Borand L, Rekacewicz C, Nerrienet E, Madec Y, Marcy O, Chan S, Prak N, Kim C, Lak KK, Hak C, Dim B, Sin CI, Sun S, Guillard B, Sar B, Vong S, Fernandez M, Fox L, Delfraissy JF, Goldfeld AE; CAMELIA (ANRS 1295-CIPRA KH001) Study Team. Earlier versus later start of antiretroviral therapy in HIV-infected adults with tuberculosis. *N Engl J Med* 2011;365:1471-81.  
[PUBMED](#) | [CROSSREF](#)
59. Havlir DV, Kendall MA, Ive P, Kumwenda J, Swindells S, Qasba SS, Luetkemeyer AF, Hogg E, Rooney JF, Wu X, Hosseinipour MC, Lalloo U, Veloso VG, Some FF, Kumarasamy N, Padayatchi N, Santos BR, Reid S, Hakim J, Mohapi L, Mugenyi P, Sanchez J, Lama JR, Pape JW, Sanchez A, Asmelash A, Moko E, Sawe F, Andersen J, Sanne I; AIDS Clinical Trials Group Study A5221. Timing of antiretroviral therapy for HIV-1 infection and tuberculosis. *N Engl J Med* 2011;365:1482-91.  
[PUBMED](#) | [CROSSREF](#)
60. Abdool Karim SS, Naidoo K, Grobler A, Padayatchi N, Baxter C, Gray AL, Gengiah T, Gengiah S, Naidoo A, Jithoo N, Nair G, El-Sadr WM, Friedland G, Abdool Karim Q. Integration of antiretroviral therapy with tuberculosis treatment. *N Engl J Med* 2011;365:1492-501.  
[PUBMED](#) | [CROSSREF](#)
61. Mfinanga SG, Kirenga BJ, Chanda DM, Mutayoba B, Mthiyane T, Yimer G, Ezechi O, Connolly C, Kapotwe V, Muwonge C, Massaga J, Sinkala E, Kohi W, Lyantumba L, Nyakoojo G, Luwaga H, Doulla B, Mzyece J,

- Kapata N, Vahedi M, Mwaba P, Egwaga S, Adatu F, Pym A, Joloba M, Rustumjee R, Zumla A, Onyebujoh P. Early versus delayed initiation of highly active antiretroviral therapy for HIV-positive adults with newly diagnosed pulmonary tuberculosis (TB-HAART): a prospective, international, randomised, placebo-controlled trial. *Lancet Infect Dis* 2014;14:563-71.  
[PUBMED](#) | [CROSSREF](#)
62. Little SJ, Holte S, Routy JP, Daar ES, Markowitz M, Collier AC, Koup RA, Mellors JW, Connick E, Conway B, Kilby M, Wang L, Whitcomb JM, Hellmann NS, Richman DD. Antiretroviral-drug resistance among patients recently infected with HIV. *N Engl J Med* 2002;347:385-94.  
[PUBMED](#) | [CROSSREF](#)
  63. Borroto-Esoda K, Waters JM, Bae AS, Harris JL, Hinkle JE, Quinn JB, Rousseau FS. Baseline genotype as a predictor of virological failure to emtricitabine or stavudine in combination with didanosine and efavirenz. *AIDS Res Hum Retroviruses* 2007;23:988-95.  
[PUBMED](#) | [CROSSREF](#)
  64. Pozniak AL, Gallant JE, DeJesus E, Arribas JR, Gazzard B, Campo RE, Chen SS, McColl D, Enejosa J, Toole JJ, Cheng AK. Tenofovir disoproxil fumarate, emtricitabine, and efavirenz versus fixed-dose zidovudine/lamivudine and efavirenz in antiretroviral-naïve patients: virologic, immunologic, and morphologic changes--a 96-week analysis. *J Acquir Immune Defic Syndr* 2006;43:535-40.  
[PUBMED](#) | [CROSSREF](#)
  65. Kuritzkes DR, Lalama CM, Ribaud HJ, Marcial M, Meyer WA 3rd, Shikuma C, Johnson VA, Fiscus SA, D'Aquila RT, Schackman BR, Acosta EP, Gulick RM. Preexisting resistance to nonnucleoside reverse-transcriptase inhibitors predicts virologic failure of an efavirenz-based regimen in treatment-naïve HIV-1 infected subjects. *J Infect Dis* 2008;197:867-70.  
[PUBMED](#) | [CROSSREF](#)
  66. Smith DM, Wong JK, Hightower GK, Ignacio CC, Koelsch KK, Petropoulos CJ, Richman DD, Little SJ. HIV drug resistance acquired through superinfection. *AIDS* 2005;19:1251-6.  
[PUBMED](#) | [CROSSREF](#)
  67. Verhofstede C, Wanzele FV, Van Der Gucht B, De Cabooter N, Plum J. Interruption of reverse transcriptase inhibitors or a switch from reverse transcriptase to protease inhibitors resulted in a fast reappearance of virus strains with a reverse transcriptase inhibitor-sensitive genotype. *AIDS* 1999;13:2541-6.  
[PUBMED](#) | [CROSSREF](#)
  68. Miller V, Sabin C, Hertogs K, Bloor S, Martinez-Picado J, D'Aquila R, Larder B, Lutz T, Gute P, Weidmann E, Rabenau H, Phillips A, Staszewski S. Virological and immunological effects of treatment interruptions in HIV-1 infected patients with treatment failure. *AIDS* 2000;14:2857-67.  
[PUBMED](#) | [CROSSREF](#)
  69. Devereux HL, Youle M, Johnson MA, Loveday C. Rapid decline in detectability of HIV-1 drug resistance mutations after stopping therapy. *AIDS* 1999;13:F123-7.  
[PUBMED](#) | [CROSSREF](#)
  70. Anonymous . ACOG committee opinion no. 762: Prepregnancy counseling. *Obstet Gynecol* 2019;133:e78-89.  
[PUBMED](#) | [CROSSREF](#)
  71. Salters K, Loutfy M, de Pokomandy A, Money D, Pick N, Wang L, Jabbari S, Carter A, Webster K, Conway T, Dubuc D, O'Brien N, Proulx-Boucher K, Kaida A; CHIWOS Research Team. Pregnancy incidence and intention after HIV diagnosis among women living with HIV in Canada. *PLoS One* 2017;12:e0180524.  
[PUBMED](#) | [CROSSREF](#)
  72. Aebi-Popp K, Mercanti V, Voide C, Nemeth J, Cusini A, Jakopp B, Nicca D, Rasi M, Bruno A, Calmy A, Martinez de Tejada B; Swiss HIV Cohort Study. Neglect of attention to reproductive health in women with HIV infection: contraceptive use and unintended pregnancies in the Swiss HIV Cohort Study. *HIV Med* 2018;19:339-46.  
[PUBMED](#) | [CROSSREF](#)
  73. Rodger AJ, Cambiano V, Bruun T, Vernazza P, Collins S, van Lunzen J, Corbelli GM, Estrada V, Geretti AM, Beloukas A, Asboe D, Viciano P, Gutiérrez F, Clotet B, Pradier C, Gerstoft J, Weber R, Westling K, Wandeler G, Prins JM, Rieger A, Stoeckle M, Kümmerle T, Bini T, Ammassari A, Gilson R, Krznaric I, Ristola M, Zangerle R, Handberg P, Antela A, Allan S, Phillips AN, Lundgren J; PARTNER Study Group. Sexual activity without condoms and risk of HIV transmission in serodifferent couples when the HIV-positive partner is using suppressive antiretroviral therapy. *JAMA* 2016;316:171-81.  
[PUBMED](#) | [CROSSREF](#)
  74. Del Romero J, Baza MB, Río I, Jerónimo A, Vera M, Hernando V, Rodríguez C, Castilla J; DDel Romero J. Natural conception in HIV-serodiscordant couples with the infected partner in suppressive antiretroviral therapy: A prospective cohort study. *Medicine (Baltimore)* 2016;95:e4398.  
[PUBMED](#) | [CROSSREF](#)

75. Pilotto JH, Velasque LS, Friedman RK, Moreira RI, Veloso VG, Grinsztejn B, Morgado MG, Watts DH, Currier JS, Hoffman RM. Maternal outcomes after HAART for the prevention of mother-to-child transmission in HIV-infected women in Brazil. *Antivir Ther* 2011;16:349-56.  
[PUBMED](#) | [CROSSREF](#)
76. Becquet R, Bland R, Ekouevi DK, Dabis F, Newell ML. Universal antiretroviral therapy among pregnant and postpartum HIV-infected women would improve maternal health and decrease postnatal HIV transmission. *AIDS* 2010;24:1239-41.  
[PUBMED](#) | [CROSSREF](#)
77. Becquet R, Ekouevi DK, Arrive E, Stringer JS, Meda N, Chaix ML, Treluyer JM, Leroy V, Rouzioux C, Blanche S, Dabis F. Universal antiretroviral therapy for pregnant and breast-feeding HIV-1-infected women: towards the elimination of mother-to-child transmission of HIV-1 in resource-limited settings. *Clin Infect Dis* 2009;49:1936-45.  
[PUBMED](#) | [CROSSREF](#)
78. Townsend CL, Cortina-Borja M, Peckham CS, de Ruiter A, Lyall H, Tookey PA. Low rates of mother-to-child transmission of HIV following effective pregnancy interventions in the United Kingdom and Ireland, 2000-2006. *AIDS* 2008;22:973-81.  
[PUBMED](#) | [CROSSREF](#)
79. Tubiana R, Le Chenadec J, Rouzioux C, Mandelbrot L, Hamrene K, Dollfus C, Faye A, Delaugerre C, Blanche S, Warszawski J. Factors associated with mother-to-child transmission of HIV-1 despite a maternal viral load <500 copies/ml at delivery: a case-control study nested in the French perinatal cohort (EPF-ANRS CO1). *Clin Infect Dis* 2010;50:585-96.  
[PUBMED](#) | [CROSSREF](#)
80. Mandelbrot L, Tubiana R, Le Chenadec J, Dollfus C, Faye A, Pannier E, Matheron S, Khuong MA, Garrait V, Reliquet V, Devidas A, Berrebi A, Allisy C, Elleau C, Arvieux C, Rouzioux C, Warszawski J, Blanche S; ANRS-EPF Study Group. No perinatal HIV-1 transmission from women with effective antiretroviral therapy starting before conception. *Clin Infect Dis* 2015;61:1715-25.  
[PUBMED](#) | [CROSSREF](#)
81. Favarato G, Bailey H, Burns F, Prieto L, Soriano-Arandes A, Thorne C. Migrant women living with HIV in Europe: are they facing inequalities in the prevention of mother-to-child-transmission of HIV?: The European Pregnancy and Paediatric HIV Cohort Collaboration (EPPICC) study group in EuroCoord. *Eur J Public Health* 2018;28:55-60.  
[PUBMED](#) | [CROSSREF](#)
82. Anonymous. ACOG committee opinion no. 751: Labor and delivery management of women with human immunodeficiency virus infection. *Obstet Gynecol* 2018;132:e131-7.  
[PUBMED](#) | [CROSSREF](#)
83. Alagaratnam J, Peters H, Francis K, Kay N, Gilleece Y, Finnerty FP, Grimes RE, Parry S, Portman M, Wait BC, Shah R, Roedling S, Hawkins DA, Chitty S, Sarner L, Marcus R, Hartley A, Nori AV, Rosenvinge M, Taylor GP; London HIV Perinatal Research Group. An observational study of initial HIV RNA decay following initiation of combination antiretroviral treatment during pregnancy. *AIDS Res Ther* 2020;17:41.  
[PUBMED](#) | [CROSSREF](#)
84. Read PJ, Mandalia S, Khan P, Harrisson U, Naftalin C, Gilleece Y, Anderson J, Hawkins DA, Taylor GP, de Ruiter A; London HIV Perinatal Research Group. When should HAART be initiated in pregnancy to achieve an undetectable HIV viral load by delivery? *AIDS* 2012;26:1095-103.  
[PUBMED](#) | [CROSSREF](#)
85. Briand N, Warszawski J, Mandelbrot L, Dollfus C, Pannier E, Cravello L, Nguyen R, Matheron I, Winer N, Tubiana R, Rouzioux C, Faye A, Blanche S; ANRS-EPF CO1-CO11 Study Group. Is intrapartum intravenous zidovudine for prevention of mother-to-child HIV-1 transmission still useful in the combination antiretroviral therapy era? *Clin Infect Dis* 2013;57:903-14.  
[PUBMED](#) | [CROSSREF](#)
86. Cotter AM, Brookfield KF, Duthely LM, Gonzalez Quintero VH, Potter JE, O'Sullivan MJ. Duration of membrane rupture and risk of perinatal transmission of HIV-1 in the era of combination antiretroviral therapy. *Am J Obstet Gynecol* 2012;207:482.e1-5.  
[PUBMED](#) | [CROSSREF](#)
87. Townsend CL, Byrne L, Cortina-Borja M, Thorne C, de Ruiter A, Lyall H, Taylor GP, Peckham CS, Tookey PA. Earlier initiation of ART and further decline in mother-to-child HIV transmission rates, 2000-2011. *AIDS* 2014;28:1049-57.  
[PUBMED](#) | [CROSSREF](#)
88. Yudin MH, Kennedy VL, MacGillivray SJ. HIV and infant feeding in resource-rich settings: considering the clinical significance of a complicated dilemma. *AIDS Care* 2016;28:1023-6.  
[PUBMED](#) | [CROSSREF](#)

89. Wade NA, Birkhead GS, Warren BL, Charbonneau TT, French PT, Wang L, Baum JB, Tesoriero JM, Savicki R. Abbreviated regimens of zidovudine prophylaxis and perinatal transmission of the human immunodeficiency virus. *N Engl J Med* 1998;339:1409-14.  
[PUBMED](#) | [CROSSREF](#)
90. Nielsen-Saines K, Watts DH, Veloso VG, Bryson YJ, Joao EC, Pilotto JH, Gray G, Theron G, Santos B, Fonseca R, Kreitchmann R, Pinto J, Mussi-Pinhata MM, Ceriotta M, Machado D, Bethel J, Morgado MG, Dickover R, Camarca M, Mirochnick M, Siberry G, Grinsztejn B, Moreira RI, Bastos FI, Xu J, Moya J, Mofenson LM; NICHD HPTN 040/PACTG 1043 Protocol Team. Three postpartum antiretroviral regimens to prevent intrapartum HIV infection. *N Engl J Med* 2012;366:2368-79.  
[PUBMED](#) | [CROSSREF](#)
